# Supplementary material
Source: ML conference proceedings conference paper supplement (https://www.ecva.net/papers/eccv_2022/papers_ECCV/html/136890603_ECCV_2022_paper.php)
Supplement: Supplementary file 1 [file 136890603-supp.pdf]

# Supplementary: BATMAN: Bilateral Attention Transformer in Motion-Appearance Neighboring Space for Video Object Segmentation

Ye Yu<sup>1</sup>, Jialin Yuan<sup>2</sup>, Gaurav Mittal<sup>1</sup>, Li Fuxin<sup>2</sup>, and Mei Chen<sup>1</sup>

<sup>1</sup> Microsoft

{yu.ye,gaurav.mittal,mei.chen}@microsoft.com

<sup>2</sup> Oregon State University

{yuanjial,lif}@oregonstate.edu

## 1 Local window size in the bilateral space

We analyze the local window size in the bilateral space ( $W_b$ ) of the bilateral attention module and its impact on VOS performance. Table 1 shows the importance of a proper  $W_b$  for bilateral attention and VOS. When the  $W_b$  is too small, relevant tokens are missed out in the bilateral attention, which decreases the VOS performance. On the other hand, if we have too large  $W_b$  size, more irrelevant tokens will be included in the bilateral attention computation (similar to the spatial local attention), which also decreases the VOS performance.

Table 1: Ablation on bilateral local window ( $W_b$ ) size. The experiment is on DAVIS 2017 validation split.  $W_b$  size needs to be carefully chosen for optimal VOS performance

| $W_b$ size | $\mathcal{J}\&\mathcal{F}$ | $\mathcal{J}$ | $\mathcal{F}$ |
|------------|----------------------------|---------------|---------------|
| 40         | 84.2                       | 81.3          | 87.0          |
| 60         | 84.7                       | 81.8          | 87.5          |
| 84         | <b>86.2</b>                | <b>83.2</b>   | <b>89.3</b>   |
| 112        | 84.9                       | 81.9          | 87.9          |

## 2 Additional segmentation visualizations

Below we provide additional segmentation visualizations on DAVIS 2017 (Fig. 1) and Youtube-VOS 2019 (Fig. 2). On both datasets, the bilateral attention segments object better compared to the spatial local attention. The bilateral attention can distinguish the objects with a similar visual appearance especially when they have different motions, which the conventional spatial local attention struggles to segment.

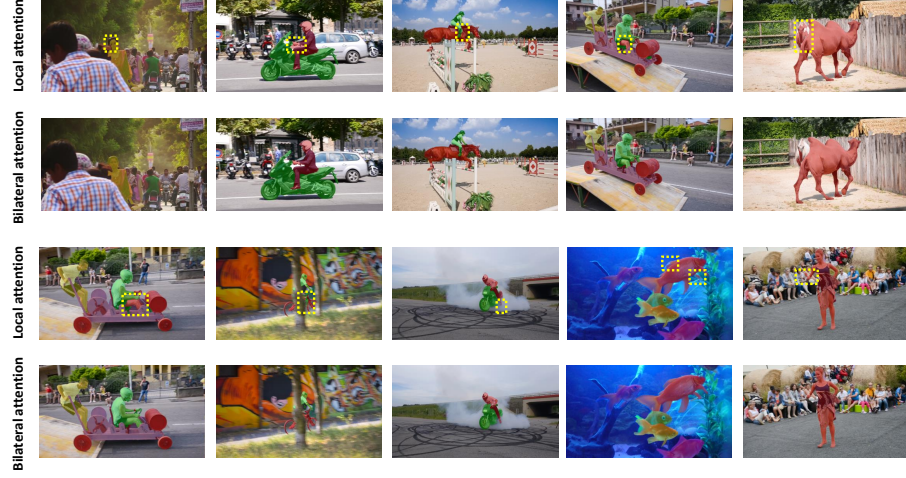

Fig. 1: Additional qualitative results on DAVIS 2017. Compared to spatial local attention, bilateral attention segments object better especially when background shares similar appearance with the target object

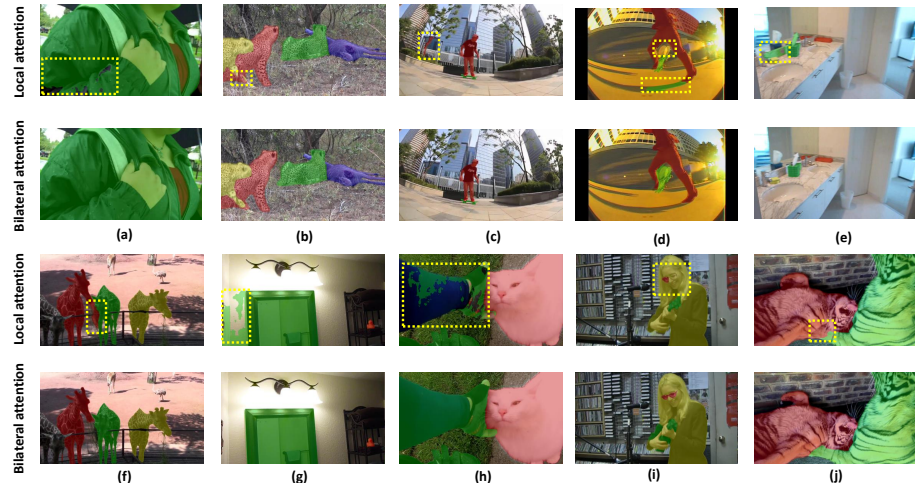

Fig. 2: Additional qualitative results on Youtube-VOS 2019. Compared to spatial local attention, bilateral attention segments object better especially when the object has a salient motion
